# Supplementary material
Source: Springer Nature journal article supplement (https://www.springermedizin.de/resource/supplementary/12967_2014_1850_MOESM2_ESM.pdf/9574960)
Supplement: MOESM2 [file 9574960]

**A****CAL**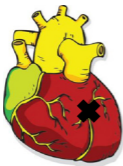

16 weeks

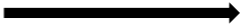**SO**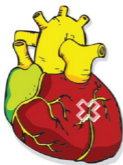

16 weeks

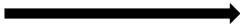**B**Control  
CAL &  
SO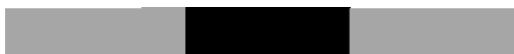Iso/Ade  
CAL &  
SO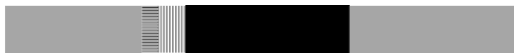

0

20

40

60

80

min

 Krebs-Henseleit perfusion 3 min perfusion with Iso at 10 nM (B) 5 min perfusion with 30  $\mu$ M Ade Global Normothermic Ischaemia
